# Supplementary material for: Cross-sectional evaluation of exposure to ozone, nitrogen dioxide, and particulate mass levels on circulating immune markers in women in the California Teachers Study
Source: Research Square preprint supplement (doi:10.21203/rs.3.rs-7566245/v1), 2025-09-30
Supplement: Supplementary file 1 [file ab0e069938b6ea62a43208ac.docx]

**Cross-sectional evaluation of exposure to ozone, nitrogen dioxide, and particulate mass levels on circulating immune markers in women in the California Teachers Study**

Supplemental Table S1. Spearman correlation values between the 15 serum-measured immune markers in 1,898 women in the California Teachers Study.

|  | **IL-1β** | **IL-6** | **IL-8** | **IL-10** | **TNFα** | **BAFF** | **CCL2** | **CCL17** | **sCD14** | **sCD25** | **sCD27** | **sCD163** | **sgp130** | **sIL-6Rα** | **sTNFR2** |
| --- | --- | --- | --- | --- | --- | --- | --- | --- | --- | --- | --- | --- | --- | --- | --- |
| **IL-1β** | 1.000 | 0.526 | 0.292 | 0.475 | 0.562 | 0.097 | 0.167 | -0.013 | -0.024 | 0.057 | 0.049 | 0.078 | 0.008 | 0.014 | 0.115 |
| **IL-6** |  | 1.000 | 0.129 | 0.566 | 0.660 | 0.195 | 0.213 | 0.022 | 0.115 | 0.160 | 0.149 | 0.203 | 0.065 | 0.124 | 0.212 |
| **IL-8** |  |  | 1.000 | 0.111 | 0.188 | 0.126 | 0.271 | 0.050 | 0.112 | 0.100 | 0.135 | 0.109 | 0.152 | 0.009 | 0.236 |
| **IL-10** |  |  |  | 1.000 | 0.627 | 0.173 | 0.163 | 0.055 | 0.049 | 0.145 | 0.130 | 0.116 | 0.044 | 0.045 | 0.159 |
| **TNFα** |  |  |  |  | 1.000 | 0.203 | 0.256 | 0.082 | 0.099 | 0.230 | 0.188 | 0.197 | 0.105 | 0.111 | 0.241 |
| **BAFF** |  |  |  |  |  | 1.000 | 0.282 | 0.170 | 0.259 | 0.381 | 0.263 | 0.306 | 0.246 | 0.180 | 0.377 |
| **CCL2** |  |  |  |  |  |  | 1.000 | 0.219 | 0.195 | 0.276 | 0.229 | 0.321 | 0.200 | 0.186 | 0.267 |
| **CCL17** |  |  |  |  |  |  |  | 1.000 | 0.080 | 0.239 | 0.236 | 0.222 | 0.176 | 0.216 | 0.197 |
| **sCD14** |  |  |  |  |  |  |  |  | 1.000 | 0.288 | 0.314 | 0.131 | 0.275 | 0.146 | 0.323 |
| **sCD25** |  |  |  |  |  |  |  |  |  | 1.000 | 0.568 | 0.387 | 0.215 | 0.291 | 0.616 |
| **sCD27** |  |  |  |  |  |  |  |  |  |  | 1.000 | 0.342 | 0.226 | 0.245 | 0.724 |
| **sCD163** |  |  |  |  |  |  |  |  |  |  |  | 1.000 | 0.307 | 0.261 | 0.458 |
| **sgp130** |  |  |  |  |  |  |  |  |  |  |  |  | 1.000 | 0.166 | 0.302 |
| **sIL-6Rα** |  |  |  |  |  |  |  |  |  |  |  |  |  | 1.000 | 0.266 |
| **sTNFR2** |  |  |  |  |  |  |  |  |  |  |  |  |  |  | 1.000 |

Supplemental Table S2. Pearson correlation values between the pollutants (measured in IQR) in 1,898 women in the California Teachers Study.

|  | Ozone (O3) | Nitrogen Dioxide (NO2) | PM0.1 Total Mass | PM2.5 Total Mass | PM10 Total Mass |
| --- | --- | --- | --- | --- | --- |
| Ozone (O3) | 1 | 0.33585 | 0.43674 | 0.28805 | 0.33319 |
| Nitrogen Dioxide (NO2) |  | 1 | 0.70696 | 0.85634 | 0.82707 |
| PM0.1 Total Mass |  |  | 1 | 0.74997 | 0.70624 |
| PM2.5 Total Mass |  |  |  | 1 | 0.93985 |
| PM10 Total Mass |  |  |  |  | 1 |

Supplemental Table S3. Comparison of study participant characteristics in the California Teachers Study cohort who had serum immune marker and pollutant measurements (N=1,898), participated in the larger biobanking study (N=13,888), and completed questionnaire 5 (N=61,984).

|  | | **Cohort with completed Q5 questionnaire (N=61,984 a)** | | **Cohort with completed Q5 questionnaire and blood sample collected (N=13,888 a)** | | **Cohort with cytokine and pollutant measurements (N=1,898a)** | | | |
| --- | --- | --- | --- | --- | --- | --- | --- | --- | --- |
| **Characteristic** | | **N** | **%** | **N** | **%** | **N** | **%** |
| Age (in years)b | |  |  |  |  |  |  |
|  | 40-49 | 4393 | 7.1% | 1333 | 9.6% | 206 | 10.9% |
|  | 50-59 | 10244 | 16.5% | 3452 | 24.9% | 551 | 29.0% |
|  | 60-69 | 22272 | 35.9% | 6586 | 47.4% | 795 | 41.9% |
|  | 70+ | 25044 | 40.4% | 2517 | 18.1% | 225 | 11.9% |
| Racec | |  |  |  |  |  |  |  | | |
|  | Non-Hispanic White | 54294 | 87.6% | 12391 | 89.2% | 1456 | 76.7% |
|  | Other | 7690 | 12.4% | 1497 | 10.8% | 442 | 23.3% |
| Socioeconomic status (SES)c | |  |  |  |  |  |  |  | | |
|  | Quartile 1 | 2376 | 3.9% | 457 | 3.3% | 163 | 8.6% |
|  | Quartile 2 | 9867 | 16.2% | 2155 | 15.7% | 725 | 38.2% |
|  | Quartile 3 | 19987 | 32.8% | 4607 | 33.5% | 449 | 23.7% |
|  | Quartile 4 | 28755 | 47.2% | 6533 | 47.5% | 544 | 28.7% |
| Body mass index (BMI)b | |  |  |  |  |  |  |  | | |
|  | <25 | 29196 | 49.7% | 6744 | 50.1% | 804 | 42.4% |
|  | 25-29 | 17967 | 30.6% | 4056 | 30.1% | 536 | 28.2% |
|  | 30+ | 11580 | 19.7% | 2672 | 19.8% | 387 | 20.4% |
| Physical Activity (hr/week)b | |  |  |  |  |  |  |  | | |
|  | 0-2.37 | 20947 | 34.3% | 3879 | 28.2% | 549 | 28.9% |
|  | 2.38-5.88 | 20136 | 33.0% | 4771 | 34.6% | 611 | 32.2% |
|  | 5.88+ | 20037 | 32.8% | 5132 | 37.2% | 605 | 31.9% |
| NSAID useb | |  |  |  |  |  |  |  | | |
|  | None or 1/week | 24616 | 42.3% | 5784 | 43.3% | 771 | 40.6% |
|  | >1/week | 33630 | 57.7% | 7581 | 56.7% | 943 | 49.7% |
| Diabetesb | |  |  |  |  |  |  |  | | |
|  | No | 56246 | 91.6% | 12891 | 93.4% | 1625 | 85.6% |
|  | Yes | 5128 | 8.4% | 907 | 6.6% | 142 | 7.5% |
| Statin useb | |  |  |  |  |  |  |  | | |
|  | None | 42336 | 69.9% | 10188 | 74.4% | 1340 | 70.6% |
|  | >1/week | 18223 | 30.1% | 3513 | 25.6% | 417 | 22.0% |
| Rural/Urban residencec | |  |  |  |  |  |  |  | | |
|  | Rural | 8813 | 14.4% | 1782 | 13.0% | 389 | 20.5% |
|  | Town | 2032 | 3.3% | 423 | 3.1% | 111 | 5.9% |
|  | City | 10905 | 17.9% | 2627 | 19.1% | 492 | 25.9% |
|  | Suburban | 33386 | 54.7% | 7586 | 55.1% | 732 | 38.6% |
|  | Urban | 5874 | 9.6% | 1342 | 9.8% | 159 | 8.4% |
| aSample sizes may not sum to the total sample size per group due to unknown covariate measures  bQuestionnaire 5 characteristic  cBaseline characteristic (Questionnaire 1) | | | | | | | | |

Supplemental Table S4. Multivariable ordinal logistic regressions for the long-term (12-months) and short-term (3-months and 1-month) associations of ozone (O3) exposure with the 15 tested cytokines. Immune markers are reported as quartiles (reference is Quartile 1), and associations are scaled by IQR.

|  |  | **IL-1β** | | | | **IL-6** | | | | **sIL-6Rα** | | | | **IL-8** | | | | **IL-10** | | | |
| --- | --- | --- | --- | --- | --- | --- | --- | --- | --- | --- | --- | --- | --- | --- | --- | --- | --- | --- | --- | --- | --- |
|  | **Cytokine quartile** | **OR** | **L** | **U** | **P value** | **OR** | **L** | **U** | **P value** | **OR** | **L** | **U** | **P value** | **OR** | **L** | **U** | **P value** | **OR** | **L** | **U** | **P value** |
| 12-month | 2 | 1.05 | 0.82 | 1.34 | 0.7208 | 0.91 | 0.72 | 1.14 | 0.4017 | 0.97 | 0.78 | 1.21 | 0.7891 | 1.21 | 0.96 | 1.53 | 0.0993 | 1.12 | 0.86 | 1.45 | 0.4058 |
| 3 | 1.28 | 1.00 | 1.63 | 0.0529 | 1.22 | 0.97 | 1.53 | 0.0956 | 1.00 | 0.80 | 1.24 | 0.9625 | 1.16 | 0.92 | 1.46 | 0.2228 | 1.06 | 0.81 | 1.37 | 0.6835 |
| 4 | 1.99 | 1.55 | 2.56 | <.0001 | 1.07 | 0.85 | 1.35 | 0.5686 | 0.98 | 0.78 | 1.23 | 0.8643 | 2.92 | 2.30 | 3.71 | <.0001 | 1.08 | 0.83 | 1.40 | 0.5569 |
| 3-month | 2 | 0.99 | 0.77 | 1.26 | 0.9052 | 0.83 | 0.66 | 1.04 | 0.1099 | 0.92 | 0.74 | 1.15 | 0.4564 | 1.28 | 1.02 | 1.62 | 0.035 | 1.14 | 0.89 | 1.47 | 0.3059 |
| 3 | 1.20 | 0.94 | 1.53 | 0.1536 | 1.04 | 0.83 | 1.30 | 0.7403 | 1.00 | 0.80 | 1.24 | 0.9765 | 1.72 | 1.36 | 2.16 | <.0001 | 1.10 | 0.85 | 1.43 | 0.4691 |
| 4 | 1.54 | 1.19 | 1.98 | 0.0009 | 0.94 | 0.75 | 1.18 | 0.5964 | 1.07 | 0.86 | 1.34 | 0.5436 | 2.37 | 1.86 | 3.01 | <.0001 | 1.03 | 0.80 | 1.33 | 0.8275 |
| 1-month | 2 | 0.97 | 0.77 | 1.23 | 0.808 | 0.90 | 0.72 | 1.11 | 0.3169 | 0.88 | 0.72 | 1.09 | 0.2334 | 1.36 | 1.08 | 1.71 | 0.0078 | 1.10 | 0.86 | 1.39 | 0.4591 |
| 3 | 1.22 | 0.97 | 1.54 | 0.0955 | 1.12 | 0.90 | 1.38 | 0.3042 | 0.96 | 0.78 | 1.18 | 0.7119 | 1.74 | 1.39 | 2.17 | <.0001 | 0.95 | 0.74 | 1.21 | 0.6666 |
| 4 | 1.51 | 1.19 | 1.90 | 0.0006 | 0.99 | 0.80 | 1.24 | 0.9575 | 1.09 | 0.88 | 1.34 | 0.4327 | 2.29 | 1.83 | 2.88 | <.0001 | 1.03 | 0.81 | 1.31 | 0.8269 |
|  |  | **TNFα** | | | | **sTNFR2** | | | | **BAFF** | | | | **CCL2** | | | | **CCL17** | | | |
|  | **Cytokine quartile** | **OR** | **L** | **U** | **P value** | **OR** | **L** | **U** | **P value** | **OR** | **L** | **U** | **P value** | **OR** | **L** | **U** | **P value** | **OR** | **L** | **U** | **P value** |
| 12-month | 2 | 1.00 | 0.80 | 1.25 | 0.9878 | 1.36 | 1.09 | 1.70 | 0.0075 | 0.98 | 0.79 | 1.22 | 0.8664 | 0.98 | 0.78 | 1.22 | 0.8383 | 0.99 | 0.79 | 1.23 | 0.9126 |
| 3 | 1.00 | 0.80 | 1.25 | 0.9753 | 1.65 | 1.31 | 2.07 | <.0001 | 1.14 | 0.91 | 1.42 | 0.2467 | 1.06 | 0.85 | 1.33 | 0.5984 | 1.06 | 0.85 | 1.32 | 0.6161 |
| 4 | 1.24 | 0.99 | 1.55 | 0.0565 | 2.00 | 1.57 | 2.55 | <.0001 | 1.11 | 0.89 | 1.39 | 0.3436 | 1.33 | 1.07 | 1.67 | 0.0118 | 1.07 | 0.85 | 1.33 | 0.5804 |
| 3-month | 2 | 0.85 | 0.68 | 1.06 | 0.1565 | 1.30 | 1.03 | 1.64 | 0.0252 | 1.23 | 0.98 | 1.54 | 0.071 | 0.88 | 0.70 | 1.10 | 0.2525 | 0.94 | 0.75 | 1.17 | 0.5659 |
| 3 | 0.99 | 0.80 | 1.24 | 0.9463 | 2.07 | 1.64 | 2.62 | <.0001 | 1.55 | 1.24 | 1.95 | 0.0001 | 0.93 | 0.74 | 1.17 | 0.531 | 1.12 | 0.90 | 1.40 | 0.3171 |
| 4 | 1.09 | 0.88 | 1.37 | 0.4278 | 2.08 | 1.63 | 2.65 | <.0001 | 1.37 | 1.10 | 1.72 | 0.006 | 1.29 | 1.03 | 1.62 | 0.0246 | 1.09 | 0.87 | 1.35 | 0.4607 |
| 1-month | 2 | 0.86 | 0.70 | 1.06 | 0.1512 | 1.35 | 1.08 | 1.69 | 0.009 | 1.28 | 1.04 | 1.59 | 0.0219 | 1.07 | 0.87 | 1.33 | 0.5137 | 0.89 | 0.72 | 1.10 | 0.2768 |
| 3 | 1.04 | 0.84 | 1.28 | 0.7257 | 2.06 | 1.65 | 2.57 | <.0001 | 1.59 | 1.29 | 1.97 | <.0001 | 1.17 | 0.95 | 1.45 | 0.1407 | 1.10 | 0.89 | 1.35 | 0.3812 |
| 4 | 1.12 | 0.91 | 1.38 | 0.2724 | 2.01 | 1.59 | 2.53 | <.0001 | 1.35 | 1.09 | 1.67 | 0.0059 | 1.46 | 1.18 | 1.80 | 0.0004 | 0.97 | 0.79 | 1.19 | 0.7518 |
|  |  | **sCD14** | | | | **sCD25** | | | | **sCD27** | | | | **sCD163** | | | | **sgp130** | | | |
|  | **Cytokine quartile** | **OR** | **L** | **U** | **P value** | **OR** | **L** | **U** | **P value** | **OR** | **L** | **U** | **P value** | **OR** | **L** | **U** | **P value** | **OR** | **L** | **U** | **P value** |
| 12-month | 2 | 1.07 | 0.86 | 1.33 | 0.5491 | 1.16 | 0.93 | 1.45 | 0.1884 | 1.04 | 0.84 | 1.30 | 0.7273 | 1.23 | 0.99 | 1.54 | 0.0654 | 1.33 | 1.07 | 1.65 | 0.0113 |
| 3 | 1.00 | 0.80 | 1.25 | 0.992 | 1.09 | 0.87 | 1.35 | 0.4723 | 1.12 | 0.90 | 1.40 | 0.3127 | 1.23 | 0.98 | 1.54 | 0.0699 | 1.31 | 1.05 | 1.63 | 0.016 |
| 4 | 1.14 | 0.91 | 1.42 | 0.2605 | 1.31 | 1.05 | 1.64 | 0.0184 | 1.14 | 0.91 | 1.43 | 0.2687 | 1.25 | 0.99 | 1.57 | 0.056 | 1.43 | 1.14 | 1.79 | 0.002 |
| 3-month | 2 | 1.01 | 0.81 | 1.26 | 0.9035 | 1.24 | 0.99 | 1.55 | 0.058 | 1.19 | 0.95 | 1.50 | 0.1325 | 0.84 | 0.67 | 1.05 | 0.1263 | 1.75 | 1.38 | 2.23 | <.0001 |
| 3 | 1.17 | 0.93 | 1.46 | 0.1781 | 1.22 | 0.98 | 1.53 | 0.0756 | 1.58 | 1.26 | 1.98 | <.0001 | 0.91 | 0.73 | 1.13 | 0.3808 | 2.10 | 1.65 | 2.66 | <.0001 |
| 4 | 1.39 | 1.12 | 1.74 | 0.0035 | 1.27 | 1.01 | 1.59 | 0.0409 | 1.81 | 1.43 | 2.29 | <.0001 | 0.90 | 0.72 | 1.13 | 0.3604 | 3.14 | 2.46 | 4.02 | <.0001 |
| 1-month | 2 | 1.10 | 0.90 | 1.36 | 0.3567 | 1.19 | 0.97 | 1.47 | 0.0981 | 1.24 | 1.00 | 1.54 | 0.0556 | 0.93 | 0.76 | 1.15 | 0.5204 | 1.49 | 1.20 | 1.86 | 0.0004 |
| 3 | 1.11 | 0.90 | 1.37 | 0.321 | 1.23 | 1.00 | 1.52 | 0.0506 | 1.63 | 1.31 | 2.01 | <.0001 | 1.01 | 0.82 | 1.25 | 0.9009 | 1.77 | 1.42 | 2.21 | <.0001 |
| 4 | 1.38 | 1.12 | 1.70 | 0.0026 | 1.22 | 0.99 | 1.51 | 0.069 | 1.70 | 1.36 | 2.12 | <.0001 | 0.92 | 0.75 | 1.14 | 0.4519 | 2.22 | 1.78 | 2.77 | <.0001 |

Supplemental Table S5. Multivariable ordinal logistic regressions for the long-term (12-months) and short-term (3-months and 1-month) associations of nitrogen dioxide (NO2) exposure with the 15 tested cytokines. Immune markers are reported as quartiles (reference is Quartile 1), and associations are scaled by IQR.

|  |  | **IL-1β** | | | | **IL-6** | | | | **sIL-6Rα** | | | | **IL-8** | | | | **IL-10** | | | |
| --- | --- | --- | --- | --- | --- | --- | --- | --- | --- | --- | --- | --- | --- | --- | --- | --- | --- | --- | --- | --- | --- |
|  | **Cytokine quartile** | **OR** | **L** | **U** | **P value** | **OR** | **L** | **U** | **P value** | **OR** | **L** | **U** | **P value** | **OR** | **L** | **U** | **P value** | **OR** | **L** | **U** | **P value** |
| 12-month | 2 | 0.99 | 0.62 | 1.58 | 0.9557 | 1.36 | 0.87 | 2.11 | 0.1774 | 1.19 | 0.77 | 1.84 | 0.4397 | 0.93 | 0.60 | 1.43 | 0.7418 | 0.95 | 0.58 | 1.57 | 0.8444 |
| 3 | 1.34 | 0.84 | 2.16 | 0.2248 | 1.16 | 0.74 | 1.81 | 0.5206 | 0.83 | 0.53 | 1.28 | 0.3864 | 0.87 | 0.56 | 1.34 | 0.5197 | 1.63 | 0.98 | 2.72 | 0.0615 |
| 4 | 1.59 | 0.97 | 2.60 | 0.0678 | 1.52 | 0.97 | 2.40 | 0.0705 | 0.98 | 0.63 | 1.52 | 0.9311 | 1.40 | 0.88 | 2.23 | 0.1520 | 0.89 | 0.54 | 1.48 | 0.6551 |
| 3-month | 2 | 0.92 | 0.68 | 1.26 | 0.6150 | 1.26 | 0.95 | 1.68 | 0.1135 | 1.00 | 0.76 | 1.32 | 0.9896 | 0.93 | 0.70 | 1.23 | 0.6093 | 1.10 | 0.79 | 1.52 | 0.5834 |
| 3 | 1.33 | 0.97 | 1.80 | 0.0732 | 1.26 | 0.94 | 1.68 | 0.1256 | 0.98 | 0.75 | 1.30 | 0.9008 | 0.91 | 0.69 | 1.21 | 0.5309 | 1.65 | 1.20 | 2.29 | 0.0024 |
| 4 | 1.31 | 0.96 | 1.80 | 0.0875 | 1.28 | 0.95 | 1.71 | 0.1010 | 0.99 | 0.75 | 1.31 | 0.9248 | 1.41 | 1.06 | 1.88 | 0.0193 | 1.00 | 0.73 | 1.39 | 0.9825 |
| 1-month | 2 | 0.98 | 0.73 | 1.31 | 0.8834 | 1.15 | 0.88 | 1.51 | 0.3077 | 1.03 | 0.80 | 1.34 | 0.8073 | 0.92 | 0.72 | 1.19 | 0.5402 | 1.04 | 0.77 | 1.42 | 0.7863 |
| 3 | 1.28 | 0.95 | 1.71 | 0.1033 | 1.15 | 0.87 | 1.51 | 0.3307 | 1.01 | 0.78 | 1.32 | 0.9225 | 0.81 | 0.62 | 1.05 | 0.1100 | 1.45 | 1.07 | 1.96 | 0.0171 |
| 4 | 1.30 | 0.96 | 1.75 | 0.0885 | 1.32 | 1.01 | 1.74 | 0.0453 | 1.18 | 0.90 | 1.54 | 0.2224 | 1.05 | 0.80 | 1.38 | 0.7235 | 1.16 | 0.85 | 1.57 | 0.3556 |
|  |  | **TNFα** | | | | **sTNFR2** | | | | **BAFF** | | | | **CCL2** | | | | **CCL17** | | | |
|  | **Cytokine quartile** | **OR** | **L** | **U** | **P value** | **OR** | **L** | **U** | **P value** | **OR** | **L** | **U** | **P value** | **OR** | **L** | **U** | **P value** | **OR** | **L** | **U** | **P value** |
| 12-month | 2 | 0.91 | 0.59 | 1.40 | 0.6731 | 0.93 | 0.60 | 1.43 | 0.7270 | 1.07 | 0.69 | 1.65 | 0.7638 | 0.78 | 0.50 | 1.20 | 0.2588 | 0.86 | 0.55 | 1.32 | 0.4833 |
| 3 | 1.58 | 1.03 | 2.45 | 0.0381 | 1.21 | 0.78 | 1.89 | 0.3903 | 1.12 | 0.73 | 1.73 | 0.6111 | 0.89 | 0.58 | 1.38 | 0.6068 | 0.88 | 0.57 | 1.35 | 0.5468 |
| 4 | 1.26 | 0.82 | 1.96 | 0.2945 | 1.35 | 0.84 | 2.16 | 0.2118 | 1.12 | 0.73 | 1.74 | 0.6002 | 0.87 | 0.56 | 1.36 | 0.5412 | 0.95 | 0.62 | 1.46 | 0.8102 |
| 3-month | 2 | 1.12 | 0.85 | 1.49 | 0.4255 | 1.04 | 0.79 | 1.37 | 0.8039 | 1.04 | 0.79 | 1.38 | 0.7636 | 1.01 | 0.76 | 1.33 | 0.9670 | 0.93 | 0.70 | 1.23 | 0.6103 |
| 3 | 1.58 | 1.19 | 2.10 | 0.0015 | 1.14 | 0.86 | 1.52 | 0.3630 | 1.02 | 0.77 | 1.35 | 0.8731 | 1.08 | 0.82 | 1.43 | 0.5810 | 0.94 | 0.71 | 1.24 | 0.6543 |
| 4 | 1.63 | 1.22 | 2.17 | 0.0008 | 1.13 | 0.84 | 1.53 | 0.4271 | 1.03 | 0.78 | 1.36 | 0.8494 | 0.90 | 0.68 | 1.20 | 0.4873 | 1.20 | 0.91 | 1.58 | 0.1971 |
| 1-month | 2 | 1.19 | 0.92 | 1.56 | 0.1915 | 1.15 | 0.89 | 1.49 | 0.2863 | 1.26 | 0.97 | 1.64 | 0.0789 | 1.21 | 0.94 | 1.57 | 0.1462 | 0.92 | 0.71 | 1.20 | 0.5319 |
| 3 | 1.56 | 1.19 | 2.02 | 0.0010 | 1.18 | 0.90 | 1.55 | 0.2301 | 1.17 | 0.90 | 1.53 | 0.2372 | 1.14 | 0.88 | 1.48 | 0.3207 | 0.95 | 0.73 | 1.24 | 0.7096 |
| 4 | 1.40 | 1.07 | 1.83 | 0.0143 | 1.30 | 0.98 | 1.72 | 0.0741 | 1.16 | 0.89 | 1.51 | 0.2721 | 0.98 | 0.75 | 1.28 | 0.8884 | 1.09 | 0.84 | 1.41 | 0.5089 |
|  |  | **sCD14** | | | | **sCD25** | | | | **sCD27** | | | | **sCD163** | | | | **sgp130** | | | |
|  | **Cytokine quartile** | **OR** | **L** | **U** | **P value** | **OR** | **L** | **U** | **P value** | **OR** | **L** | **U** | **P value** | **OR** | **L** | **U** | **P value** | **OR** | **L** | **U** | **P value** |
| 12-month | 2 | 0.87 | 0.56 | 1.35 | 0.5416 | 1.12 | 0.73 | 1.72 | 0.6019 | 0.88 | 0.57 | 1.36 | 0.5767 | 1.18 | 0.76 | 1.81 | 0.4659 | 0.78 | 0.51 | 1.22 | 0.2776 |
| 3 | 0.89 | 0.57 | 1.37 | 0.5919 | 1.26 | 0.81 | 1.95 | 0.3026 | 1.15 | 0.75 | 1.78 | 0.5215 | 1.57 | 1.01 | 2.43 | 0.0454 | 0.93 | 0.60 | 1.45 | 0.7562 |
| 4 | 0.82 | 0.53 | 1.27 | 0.3707 | 1.22 | 0.78 | 1.90 | 0.3855 | 1.59 | 1.01 | 2.49 | 0.0451 | 1.36 | 0.87 | 2.13 | 0.1716 | 0.98 | 0.63 | 1.52 | 0.9369 |
| 3-month | 2 | 0.90 | 0.69 | 1.19 | 0.4578 | 1.24 | 0.94 | 1.63 | 0.1352 | 0.80 | 0.61 | 1.06 | 0.1164 | 1.18 | 0.89 | 1.56 | 0.2599 | 0.75 | 0.57 | 0.99 | 0.0391 |
| 3 | 0.91 | 0.69 | 1.20 | 0.5162 | 1.26 | 0.95 | 1.66 | 0.1114 | 0.91 | 0.69 | 1.21 | 0.5305 | 1.28 | 0.96 | 1.71 | 0.0883 | 0.82 | 0.62 | 1.08 | 0.1646 |
| 4 | 0.93 | 0.70 | 1.23 | 0.5885 | 1.26 | 0.95 | 1.68 | 0.1074 | 1.11 | 0.84 | 1.48 | 0.4685 | 1.34 | 1.01 | 1.79 | 0.0445 | 0.86 | 0.64 | 1.14 | 0.2820 |
| 1-month | 2 | 0.95 | 0.73 | 1.22 | 0.6720 | 1.20 | 0.93 | 1.56 | 0.1683 | 0.89 | 0.69 | 1.16 | 0.3985 | 1.21 | 0.93 | 1.58 | 0.1573 | 0.73 | 0.57 | 0.95 | 0.0178 |
| 3 | 0.94 | 0.72 | 1.22 | 0.6396 | 1.17 | 0.90 | 1.52 | 0.2427 | 1.03 | 0.79 | 1.34 | 0.8209 | 1.30 | 1.00 | 1.71 | 0.0538 | 0.73 | 0.57 | 0.95 | 0.0196 |
| 4 | 0.93 | 0.71 | 1.21 | 0.5758 | 1.26 | 0.96 | 1.64 | 0.0938 | 1.27 | 0.97 | 1.67 | 0.0806 | 1.32 | 1.00 | 1.73 | 0.0470 | 0.94 | 0.72 | 1.23 | 0.6656 |

Supplemental Table S6. Multivariable ordinal logistic regressions for the long-term (12-months) and short-term (3-months and 1-month) associations of particulate matter less than 0.1µm (PM0.1) exposure with the 15 tested cytokines. Immune markers are reported as quartiles (reference is Quartile 1), and associations are scaled by IQR.

|  |  | **IL-1β** | | | | **IL-6** | | | | **sIL-6Rα** | | | | **IL-8** | | | | **IL-10** | | | |
| --- | --- | --- | --- | --- | --- | --- | --- | --- | --- | --- | --- | --- | --- | --- | --- | --- | --- | --- | --- | --- | --- |
|  | **Cytokine quartile** | **OR** | **L** | **U** | **P value** | **OR** | **L** | **U** | **P value** | **OR** | **L** | **U** | **P value** | **OR** | **L** | **U** | **P value** | **OR** | **L** | **U** | **P value** |
| 12-month | 2 | 0.99 | 0.78 | 1.24 | 0.9003 | 1.11 | 0.89 | 1.38 | 0.3464 | 0.94 | 0.76 | 1.17 | 0.6042 | 0.99 | 0.81 | 1.22 | 0.9371 | 0.95 | 0.74 | 1.22 | 0.6618 |
| 3 | 0.86 | 0.68 | 1.09 | 0.2074 | 0.98 | 0.78 | 1.23 | 0.8505 | 1.19 | 0.96 | 1.46 | 0.1102 | 0.95 | 0.77 | 1.17 | 0.6342 | 0.78 | 0.61 | 1.02 | 0.0658 |
| 4 | 0.70 | 0.54 | 0.90 | 0.0057 | 0.98 | 0.78 | 1.23 | 0.8597 | 0.93 | 0.75 | 1.16 | 0.5285 | 0.57 | 0.45 | 0.72 | <.0001 | 1.01 | 0.79 | 1.29 | 0.9429 |
| 3-month | 2 | 0.88 | 0.70 | 1.11 | 0.2722 | 1.10 | 0.89 | 1.36 | 0.4011 | 0.98 | 0.79 | 1.20 | 0.8195 | 1.08 | 0.89 | 1.32 | 0.4407 | 0.86 | 0.68 | 1.10 | 0.2425 |
| 3 | 0.69 | 0.54 | 0.88 | 0.0028 | 0.97 | 0.78 | 1.21 | 0.7888 | 1.04 | 0.84 | 1.27 | 0.7476 | 0.96 | 0.78 | 1.18 | 0.6750 | 0.71 | 0.55 | 0.91 | 0.0079 |
| 4 | 0.64 | 0.49 | 0.82 | 0.0004 | 1.02 | 0.82 | 1.28 | 0.8593 | 0.95 | 0.77 | 1.17 | 0.6258 | 0.70 | 0.56 | 0.88 | 0.0022 | 0.93 | 0.73 | 1.18 | 0.5233 |
| 1-month | 2 | 0.86 | 0.70 | 1.04 | 0.1244 | 1.09 | 0.91 | 1.31 | 0.3515 | 1.03 | 0.86 | 1.24 | 0.7187 | 0.95 | 0.80 | 1.13 | 0.5662 | 0.92 | 0.75 | 1.13 | 0.4242 |
| 3 | 0.71 | 0.58 | 0.89 | 0.0025 | 1.00 | 0.82 | 1.21 | 0.9735 | 1.04 | 0.87 | 1.25 | 0.6630 | 0.91 | 0.76 | 1.09 | 0.3215 | 0.81 | 0.66 | 1.01 | 0.0622 |
| 4 | 0.66 | 0.52 | 0.83 | 0.0004 | 0.90 | 0.74 | 1.10 | 0.2933 | 0.80 | 0.66 | 0.98 | 0.0333 | 0.80 | 0.66 | 0.98 | 0.0312 | 0.83 | 0.66 | 1.03 | 0.0854 |
|  |  | **TNFα** | | | | **sTNFR2** | | | | **BAFF** | | | | **CCL2** | | | | **CCL17** | | | |
|  | **Cytokine quartile** | **OR** | **L** | **U** | **P value** | **OR** | **L** | **U** | **P value** | **OR** | **L** | **U** | **P value** | **OR** | **L** | **U** | **P value** | **OR** | **L** | **U** | **P value** |
| 12-month | 2 | 1.05 | 0.85 | 1.30 | 0.6628 | 0.96 | 0.78 | 1.18 | 0.7102 | 1.06 | 0.86 | 1.30 | 0.6069 | 1.26 | 1.02 | 1.57 | 0.0356 | 0.92 | 0.74 | 1.14 | 0.4345 |
| 3 | 0.99 | 0.80 | 1.22 | 0.8993 | 0.80 | 0.65 | 1.00 | 0.0463 | 0.89 | 0.72 | 1.10 | 0.2883 | 1.19 | 0.95 | 1.48 | 0.1246 | 0.93 | 0.75 | 1.15 | 0.5009 |
| 4 | 0.98 | 0.79 | 1.21 | 0.8246 | 0.69 | 0.54 | 0.87 | 0.0019 | 0.94 | 0.75 | 1.16 | 0.5504 | 1.10 | 0.88 | 1.38 | 0.3870 | 1.00 | 0.81 | 1.24 | 0.9949 |
| 3-month | 2 | 1.07 | 0.87 | 1.31 | 0.5364 | 0.96 | 0.78 | 1.17 | 0.6872 | 1.24 | 1.01 | 1.53 | 0.0380 | 1.31 | 1.05 | 1.62 | 0.0158 | 1.01 | 0.82 | 1.25 | 0.9026 |
| 3 | 1.02 | 0.82 | 1.25 | 0.8911 | 0.80 | 0.64 | 1.00 | 0.0458 | 1.01 | 0.82 | 1.26 | 0.9000 | 1.42 | 1.15 | 1.77 | 0.0014 | 0.94 | 0.76 | 1.16 | 0.5321 |
| 4 | 0.87 | 0.70 | 1.08 | 0.2104 | 0.83 | 0.66 | 1.04 | 0.1091 | 1.05 | 0.85 | 1.30 | 0.6751 | 1.30 | 1.04 | 1.63 | 0.0201 | 0.91 | 0.74 | 1.13 | 0.3942 |
| 1-month | 2 | 1.00 | 0.83 | 1.19 | 0.9548 | 0.85 | 0.71 | 1.01 | 0.0575 | 1.06 | 0.89 | 1.26 | 0.5051 | 0.98 | 0.81 | 1.18 | 0.7924 | 1.12 | 0.93 | 1.34 | 0.2516 |
| 3 | 0.93 | 0.78 | 1.12 | 0.4441 | 0.79 | 0.65 | 0.96 | 0.0151 | 0.90 | 0.74 | 1.09 | 0.2761 | 1.10 | 0.92 | 1.32 | 0.2901 | 0.99 | 0.81 | 1.20 | 0.9175 |
| 4 | 0.83 | 0.68 | 1.01 | 0.0568 | 0.73 | 0.59 | 0.89 | 0.0021 | 0.94 | 0.78 | 1.13 | 0.5104 | 1.09 | 0.90 | 1.31 | 0.3810 | 1.12 | 0.93 | 1.35 | 0.2242 |
|  |  | **sCD14** | | | | **sCD25** | | | | **sCD27** | | | | **sCD163** | | | | **sgp130** | | | |
|  | **Cytokine quartile** | **OR** | **L** | **U** | **P value** | **OR** | **L** | **U** | **P value** | **OR** | **L** | **U** | **P value** | **OR** | **L** | **U** | **P value** | **OR** | **L** | **U** | **P value** |
| 12-month | 2 | 0.97 | 0.79 | 1.20 | 0.7783 | 0.98 | 0.79 | 1.21 | 0.8276 | 0.99 | 0.80 | 1.21 | 0.9064 | 1.01 | 0.82 | 1.24 | 0.9501 | 0.93 | 0.76 | 1.15 | 0.5105 |
| 3 | 0.85 | 0.68 | 1.05 | 0.1244 | 0.99 | 0.80 | 1.22 | 0.9148 | 0.88 | 0.71 | 1.09 | 0.2352 | 0.94 | 0.76 | 1.16 | 0.5551 | 0.84 | 0.68 | 1.04 | 0.1111 |
| 4 | 0.79 | 0.64 | 0.99 | 0.0383 | 0.82 | 0.66 | 1.03 | 0.0843 | 0.72 | 0.58 | 0.91 | 0.0054 | 0.90 | 0.72 | 1.12 | 0.3561 | 0.76 | 0.61 | 0.94 | 0.0129 |
| 3-month | 2 | 1.09 | 0.89 | 1.33 | 0.4225 | 1.03 | 0.83 | 1.26 | 0.8138 | 1.03 | 0.84 | 1.27 | 0.7540 | 1.15 | 0.93 | 1.42 | 0.1962 | 1.02 | 0.83 | 1.25 | 0.8868 |
| 3 | 0.93 | 0.75 | 1.15 | 0.4990 | 1.08 | 0.88 | 1.33 | 0.4520 | 1.03 | 0.83 | 1.26 | 0.8089 | 1.19 | 0.96 | 1.48 | 0.1070 | 1.01 | 0.82 | 1.25 | 0.9154 |
| 4 | 0.89 | 0.72 | 1.11 | 0.2946 | 0.91 | 0.73 | 1.13 | 0.4018 | 0.85 | 0.68 | 1.06 | 0.1522 | 1.02 | 0.82 | 1.27 | 0.8779 | 0.83 | 0.66 | 1.04 | 0.0986 |
| 1-month | 2 | 0.95 | 0.80 | 1.13 | 0.5378 | 0.96 | 0.80 | 1.15 | 0.6677 | 0.95 | 0.80 | 1.13 | 0.5842 | 1.05 | 0.87 | 1.27 | 0.5968 | 0.98 | 0.82 | 1.17 | 0.8170 |
| 3 | 0.83 | 0.69 | 0.99 | 0.0428 | 1.01 | 0.85 | 1.21 | 0.8914 | 0.94 | 0.78 | 1.12 | 0.4637 | 1.11 | 0.92 | 1.34 | 0.2790 | 1.02 | 0.86 | 1.22 | 0.8000 |
| 4 | 0.85 | 0.70 | 1.02 | 0.0846 | 0.91 | 0.75 | 1.10 | 0.3358 | 0.76 | 0.62 | 0.93 | 0.0065 | 1.00 | 0.82 | 1.22 | 0.9918 | 0.79 | 0.65 | 0.96 | 0.0181 |

Supplemental Table S7. Multivariable ordinal logistic regressions for the long-term (12-months) and short-term (3-months and 1-month) associations of particulate matter less than 2.5µm (PM2.5) exposure with the 15 tested cytokines. Immune markers are reported as quartiles (reference is Quartile 1), and associations are scaled by IQR.

|  |  | **IL-1β** | | | | **IL-6** | | | | **sIL-6Rα** | | | | **IL-8** | | | | **IL-10** | | | |
| --- | --- | --- | --- | --- | --- | --- | --- | --- | --- | --- | --- | --- | --- | --- | --- | --- | --- | --- | --- | --- | --- |
|  | **Cytokine quartile** | **OR** | **L** | **U** | **P value** | **OR** | **L** | **U** | **P value** | **OR** | **L** | **U** | **P value** | **OR** | **L** | **U** | **P value** | **OR** | **L** | **U** | **P value** |
| 12-month | 2 | 0.89 | 0.59 | 1.34 | 0.5699 | 0.93 | 0.63 | 1.37 | 0.7103 | 0.64 | 0.44 | 0.94 | 0.0224 | 1.05 | 0.72 | 1.53 | 0.8169 | 1.07 | 0.69 | 1.68 | 0.7546 |
| 3 | 0.72 | 0.47 | 1.10 | 0.1245 | 1.10 | 0.74 | 1.62 | 0.6511 | 1.05 | 0.72 | 1.53 | 0.8211 | 1.35 | 0.92 | 1.96 | 0.1234 | 0.84 | 0.53 | 1.31 | 0.4379 |
| 4 | 0.63 | 0.41 | 0.97 | 0.0371 | 0.81 | 0.54 | 1.21 | 0.2943 | 0.88 | 0.60 | 1.29 | 0.4976 | 0.85 | 0.57 | 1.26 | 0.4203 | 1.18 | 0.76 | 1.85 | 0.4608 |
| 3-month | 2 | 1.01 | 0.82 | 1.26 | 0.9024 | 0.94 | 0.77 | 1.16 | 0.5781 | 0.91 | 0.74 | 1.11 | 0.3364 | 0.94 | 0.77 | 1.14 | 0.5205 | 0.96 | 0.76 | 1.22 | 0.7632 |
| 3 | 0.78 | 0.63 | 0.98 | 0.0324 | 0.95 | 0.77 | 1.18 | 0.6445 | 0.97 | 0.80 | 1.18 | 0.7712 | 0.98 | 0.81 | 1.20 | 0.8758 | 0.76 | 0.59 | 0.97 | 0.0258 |
| 4 | 0.90 | 0.72 | 1.13 | 0.3562 | 0.92 | 0.74 | 1.14 | 0.4412 | 0.92 | 0.75 | 1.13 | 0.4443 | 0.78 | 0.63 | 0.96 | 0.0201 | 1.05 | 0.83 | 1.33 | 0.6755 |
| 1-month | 2 | 0.98 | 0.81 | 1.20 | 0.8702 | 1.04 | 0.86 | 1.26 | 0.7077 | 0.91 | 0.75 | 1.09 | 0.2816 | 0.92 | 0.77 | 1.11 | 0.3751 | 1.01 | 0.81 | 1.25 | 0.9577 |
| 3 | 0.72 | 0.59 | 0.89 | 0.0024 | 1.00 | 0.82 | 1.22 | 0.9843 | 0.95 | 0.79 | 1.14 | 0.5665 | 1.12 | 0.94 | 1.34 | 0.2175 | 0.86 | 0.69 | 1.07 | 0.165 |
| 4 | 0.76 | 0.61 | 0.94 | 0.0113 | 0.86 | 0.70 | 1.05 | 0.1279 | 0.75 | 0.62 | 0.91 | 0.0041 | 0.83 | 0.68 | 1.02 | 0.0721 | 0.95 | 0.77 | 1.19 | 0.6652 |
|  |  | **TNFα** | | | | **sTNFR2** | | | | **BAFF** | | | | **CCL2** | | | | **CCL17** | | | |
|  | **Cytokine quartile** | **OR** | **L** | **U** | **P value** | **OR** | **L** | **U** | **P value** | **OR** | **L** | **U** | **P value** | **OR** | **L** | **U** | **P value** | **OR** | **L** | **U** | **P value** |
| 12-month | 2 | 1.27 | 0.87 | 1.85 | 0.2146 | 1.06 | 0.73 | 1.54 | 0.7689 | 1.21 | 0.83 | 1.77 | 0.3177 | 1.69 | 1.15 | 2.48 | 0.0078 | 1.16 | 0.79 | 1.70 | 0.4529 |
| 3 | 0.93 | 0.64 | 1.36 | 0.7109 | 0.97 | 0.66 | 1.43 | 0.8855 | 1.01 | 0.69 | 1.47 | 0.9797 | 1.29 | 0.88 | 1.89 | 0.1994 | 1.25 | 0.85 | 1.83 | 0.2594 |
| 4 | 0.97 | 0.66 | 1.43 | 0.8767 | 0.83 | 0.55 | 1.25 | 0.3675 | 0.93 | 0.64 | 1.37 | 0.7254 | 1.45 | 0.98 | 2.15 | 0.0599 | 1.19 | 0.81 | 1.74 | 0.3765 |
| 3-month | 2 | 0.98 | 0.81 | 1.20 | 0.8508 | 1.00 | 0.82 | 1.21 | 0.9739 | 1.13 | 0.93 | 1.37 | 0.2334 | 1.16 | 0.95 | 1.43 | 0.1472 | 1.01 | 0.82 | 1.24 | 0.9161 |
| 3 | 0.82 | 0.67 | 1.01 | 0.0582 | 0.97 | 0.78 | 1.19 | 0.7363 | 1.02 | 0.83 | 1.25 | 0.861 | 0.98 | 0.79 | 1.20 | 0.8207 | 1.07 | 0.87 | 1.31 | 0.5219 |
| 4 | 0.70 | 0.57 | 0.87 | 0.0012 | 0.98 | 0.79 | 1.22 | 0.8465 | 1.02 | 0.83 | 1.25 | 0.864 | 1.23 | 0.99 | 1.51 | 0.0566 | 0.97 | 0.80 | 1.19 | 0.7972 |
| 1-month | 2 | 0.92 | 0.77 | 1.11 | 0.4005 | 0.86 | 0.72 | 1.04 | 0.1139 | 0.94 | 0.79 | 1.13 | 0.4965 | 1.02 | 0.85 | 1.23 | 0.8099 | 1.04 | 0.87 | 1.26 | 0.6505 |
| 3 | 0.85 | 0.71 | 1.02 | 0.0793 | 0.87 | 0.72 | 1.05 | 0.1376 | 0.84 | 0.70 | 1.02 | 0.0726 | 0.97 | 0.81 | 1.17 | 0.7738 | 1.03 | 0.85 | 1.25 | 0.746 |
| 4 | 0.77 | 0.63 | 0.93 | 0.0074 | 0.80 | 0.65 | 0.98 | 0.0271 | 0.88 | 0.73 | 1.06 | 0.1774 | 1.11 | 0.92 | 1.35 | 0.263 | 1.05 | 0.87 | 1.26 | 0.629 |
|  |  | **sCD14** | | | | **sCD25** | | | | **sCD27** | | | | **sCD163** | | | | **sgp130** | | | |
|  | **Cytokine quartile** | **OR** | **L** | **U** | **P value** | **OR** | **L** | **U** | **P value** | **OR** | **L** | **U** | **P value** | **OR** | **L** | **U** | **P value** | **OR** | **L** | **U** | **P value** |
| 12-month | 2 | 1.06 | 0.72 | 1.55 | 0.7776 | 1.05 | 0.72 | 1.53 | 0.8032 | 0.94 | 0.64 | 1.36 | 0.7257 | 0.86 | 0.59 | 1.26 | 0.4442 | 0.97 | 0.66 | 1.42 | 0.8678 |
| 3 | 1.10 | 0.75 | 1.62 | 0.6105 | 0.92 | 0.63 | 1.34 | 0.6578 | 0.85 | 0.58 | 1.24 | 0.388 | 0.66 | 0.45 | 0.97 | 0.0364 | 0.83 | 0.57 | 1.21 | 0.3365 |
| 4 | 1.19 | 0.81 | 1.74 | 0.3844 | 0.90 | 0.61 | 1.32 | 0.5759 | 0.78 | 0.53 | 1.16 | 0.2192 | 0.78 | 0.53 | 1.15 | 0.204 | 0.99 | 0.67 | 1.44 | 0.9414 |
| 3-month | 2 | 1.00 | 0.82 | 1.22 | 0.9997 | 0.89 | 0.73 | 1.09 | 0.268 | 1.03 | 0.84 | 1.25 | 0.7797 | 0.97 | 0.79 | 1.19 | 0.7544 | 1.11 | 0.91 | 1.35 | 0.3133 |
| 3 | 0.97 | 0.80 | 1.19 | 0.7919 | 0.87 | 0.71 | 1.07 | 0.1814 | 1.01 | 0.83 | 1.23 | 0.9405 | 0.89 | 0.72 | 1.09 | 0.2466 | 0.98 | 0.79 | 1.20 | 0.8194 |
| 4 | 0.93 | 0.76 | 1.14 | 0.4731 | 0.85 | 0.70 | 1.05 | 0.1292 | 0.92 | 0.75 | 1.14 | 0.4449 | 0.88 | 0.71 | 1.08 | 0.2267 | 1.08 | 0.88 | 1.33 | 0.4469 |
| 1-month | 2 | 0.95 | 0.80 | 1.14 | 0.5869 | 0.92 | 0.77 | 1.10 | 0.3653 | 0.89 | 0.74 | 1.07 | 0.2046 | 0.95 | 0.79 | 1.15 | 0.5958 | 1.07 | 0.89 | 1.28 | 0.4717 |
| 3 | 0.93 | 0.78 | 1.12 | 0.4629 | 0.92 | 0.76 | 1.10 | 0.3619 | 0.86 | 0.71 | 1.03 | 0.0956 | 0.86 | 0.71 | 1.04 | 0.1279 | 1.01 | 0.84 | 1.21 | 0.9416 |
| 4 | 0.91 | 0.76 | 1.10 | 0.3452 | 0.82 | 0.68 | 0.99 | 0.0383 | 0.79 | 0.65 | 0.96 | 0.0152 | 0.88 | 0.73 | 1.07 | 0.2016 | 0.97 | 0.80 | 1.16 | 0.716 |

Supplemental Table S8. Multivariable ordinal logistic regressions for the long-term (12-months) and short-term (3-months and 1-month) associations of particulate matter less than 10µm (PM10) exposure with the 15 tested cytokines.

|  |  | **IL-1β** | | | | **IL-6** | | | | **sIL-6Rα** | | | | **IL-8** | | | | **IL-10** | | | |
| --- | --- | --- | --- | --- | --- | --- | --- | --- | --- | --- | --- | --- | --- | --- | --- | --- | --- | --- | --- | --- | --- |
|  | **Cytokine quartile** | **OR** | **L** | **U** | **P value** | **OR** | **L** | **U** | **P value** | **OR** | **L** | **U** | **P value** | **OR** | **L** | **U** | **P value** | **OR** | **L** | **U** | **P value** |
| 12-month | 2 | 1.01 | 0.74 | 1.39 | 0.9344 | 0.87 | 0.65 | 1.18 | 0.3749 | 0.82 | 0.61 | 1.10 | 0.1806 | 0.90 | 0.67 | 1.21 | 0.4912 | 1.07 | 0.76 | 1.51 | 0.6817 |
| 3 | 0.86 | 0.62 | 1.18 | 0.3474 | 0.93 | 0.69 | 1.25 | 0.6372 | 1.05 | 0.79 | 1.40 | 0.7303 | 1.13 | 0.84 | 1.51 | 0.4283 | 0.71 | 0.50 | 1.01 | 0.0594 |
| 4 | 0.56 | 0.40 | 0.78 | 0.0006 | 0.74 | 0.55 | 1.01 | 0.0587 | 1.06 | 0.79 | 1.42 | 0.6892 | 0.49 | 0.36 | 0.66 | <.0001 | 1.03 | 0.73 | 1.45 | 0.8846 |
| 3-month | 2 | 1.07 | 0.91 | 1.27 | 0.4242 | 0.94 | 0.80 | 1.10 | 0.4413 | 0.97 | 0.82 | 1.13 | 0.6582 | 0.89 | 0.76 | 1.04 | 0.1324 | 0.98 | 0.82 | 1.19 | 0.8686 |
| 3 | 0.89 | 0.74 | 1.06 | 0.1898 | 0.95 | 0.80 | 1.12 | 0.5276 | 1.01 | 0.87 | 1.18 | 0.8891 | 0.92 | 0.79 | 1.07 | 0.2823 | 0.76 | 0.62 | 0.93 | 0.0068 |
| 4 | 0.90 | 0.75 | 1.08 | 0.2520 | 0.87 | 0.73 | 1.03 | 0.1069 | 0.98 | 0.83 | 1.15 | 0.7684 | 0.64 | 0.53 | 0.77 | <.0001 | 1.01 | 0.84 | 1.22 | 0.8797 |
| 1-month | 2 | 1.04 | 0.88 | 1.22 | 0.6702 | 0.97 | 0.83 | 1.15 | 0.7523 | 0.95 | 0.81 | 1.11 | 0.5122 | 0.89 | 0.76 | 1.04 | 0.1397 | 0.99 | 0.82 | 1.19 | 0.8852 |
| 3 | 0.84 | 0.70 | 1.01 | 0.0576 | 0.98 | 0.83 | 1.15 | 0.7620 | 0.99 | 0.85 | 1.16 | 0.9081 | 1.04 | 0.89 | 1.21 | 0.6014 | 0.83 | 0.68 | 1.00 | 0.0478 |
| 4 | 0.82 | 0.68 | 0.99 | 0.0339 | 0.83 | 0.69 | 0.99 | 0.0344 | 0.86 | 0.72 | 1.01 | 0.0686 | 0.70 | 0.58 | 0.84 | 0.0002 | 0.93 | 0.77 | 1.12 | 0.4455 |
|  |  | **TNFα** | | | | **sTNFR2** | | | | **BAFF** | | | | **CCL2** | | | | **CCL17** | | | |
|  | **Cytokine quartile** | **OR** | **L** | **U** | **P value** | **OR** | **L** | **U** | **P value** | **OR** | **L** | **U** | **P value** | **OR** | **L** | **U** | **P value** | **OR** | **L** | **U** | **P value** |
| 12-month | 2 | 1.07 | 0.80 | 1.42 | 0.6716 | 1.02 | 0.76 | 1.37 | 0.8931 | 1.15 | 0.86 | 1.54 | 0.3547 | 1.34 | 0.99 | 1.81 | 0.0582 | 0.97 | 0.72 | 1.30 | 0.8291 |
| 3 | 0.85 | 0.64 | 1.14 | 0.2821 | 0.99 | 0.73 | 1.33 | 0.9279 | 1.13 | 0.84 | 1.51 | 0.4291 | 1.27 | 0.94 | 1.71 | 0.1202 | 0.99 | 0.74 | 1.33 | 0.9689 |
| 4 | 0.83 | 0.62 | 1.11 | 0.1986 | 0.87 | 0.63 | 1.19 | 0.3757 | 1.01 | 0.75 | 1.36 | 0.9618 | 1.24 | 0.92 | 1.68 | 0.1597 | 1.10 | 0.82 | 1.46 | 0.5262 |
| 3-month | 2 | 0.96 | 0.82 | 1.12 | 0.5969 | 1.00 | 0.85 | 1.16 | 0.9457 | 1.01 | 0.87 | 1.19 | 0.8635 | 1.06 | 0.90 | 1.24 | 0.4978 | 0.94 | 0.80 | 1.10 | 0.4354 |
| 3 | 0.85 | 0.73 | 1.00 | 0.0435 | 0.98 | 0.83 | 1.15 | 0.7563 | 1.03 | 0.87 | 1.21 | 0.7604 | 0.96 | 0.81 | 1.14 | 0.6476 | 0.99 | 0.84 | 1.16 | 0.9049 |
| 4 | 0.76 | 0.64 | 0.90 | 0.0014 | 0.95 | 0.80 | 1.13 | 0.5556 | 1.00 | 0.85 | 1.18 | 0.9658 | 1.15 | 0.97 | 1.35 | 0.1079 | 0.98 | 0.84 | 1.14 | 0.8035 |
| 1-month | 2 | 0.91 | 0.78 | 1.07 | 0.2508 | 0.93 | 0.79 | 1.08 | 0.3259 | 0.92 | 0.78 | 1.07 | 0.2801 | 0.98 | 0.84 | 1.15 | 0.8347 | 0.98 | 0.83 | 1.15 | 0.8188 |
| 3 | 0.85 | 0.72 | 0.99 | 0.0383 | 0.94 | 0.80 | 1.11 | 0.4452 | 0.95 | 0.81 | 1.12 | 0.5622 | 0.93 | 0.79 | 1.10 | 0.4117 | 1.00 | 0.85 | 1.18 | 0.9771 |
| 4 | 0.79 | 0.67 | 0.94 | 0.0063 | 0.86 | 0.72 | 1.03 | 0.1001 | 0.93 | 0.79 | 1.10 | 0.3914 | 1.07 | 0.91 | 1.26 | 0.4091 | 1.02 | 0.88 | 1.20 | 0.7806 |
|  |  | **sCD14** | | | | **sCD25** | | | | **sCD27** | | | | **sCD163** | | | | **sgp130** | | | |
|  | **Cytokine quartile** | **OR** | **L** | **U** | **P value** | **OR** | **L** | **U** | **P value** | **OR** | **L** | **U** | **P value** | **OR** | **L** | **U** | **P value** | **OR** | **L** | **U** | **P value** |
| 12-month | 2 | 1.02 | 0.76 | 1.37 | 0.9083 | 1.04 | 0.78 | 1.39 | 0.7846 | 0.97 | 0.73 | 1.30 | 0.8567 | 0.89 | 0.66 | 1.19 | 0.4184 | 1.08 | 0.81 | 1.46 | 0.5947 |
| 3 | 1.10 | 0.82 | 1.47 | 0.5380 | 0.94 | 0.70 | 1.27 | 0.7002 | 1.00 | 0.75 | 1.33 | 0.9822 | 0.78 | 0.58 | 1.05 | 0.0959 | 1.08 | 0.80 | 1.45 | 0.6322 |
| 4 | 1.29 | 0.96 | 1.73 | 0.0869 | 0.96 | 0.71 | 1.30 | 0.7932 | 0.93 | 0.69 | 1.26 | 0.6319 | 0.85 | 0.63 | 1.14 | 0.2810 | 1.30 | 0.97 | 1.74 | 0.0810 |
| 3-month | 2 | 0.98 | 0.84 | 1.15 | 0.8245 | 0.97 | 0.83 | 1.13 | 0.6829 | 0.99 | 0.85 | 1.16 | 0.9170 | 0.98 | 0.84 | 1.15 | 0.8267 | 1.07 | 0.91 | 1.25 | 0.4147 |
| 3 | 0.97 | 0.83 | 1.13 | 0.6939 | 0.93 | 0.79 | 1.10 | 0.3988 | 1.00 | 0.85 | 1.17 | 0.9639 | 0.94 | 0.80 | 1.11 | 0.4924 | 0.98 | 0.84 | 1.16 | 0.8352 |
| 4 | 0.98 | 0.83 | 1.15 | 0.7927 | 0.96 | 0.82 | 1.13 | 0.6423 | 0.92 | 0.78 | 1.08 | 0.2967 | 0.94 | 0.80 | 1.11 | 0.4916 | 1.10 | 0.93 | 1.29 | 0.2644 |
| 1-month | 2 | 0.98 | 0.84 | 1.14 | 0.7754 | 0.97 | 0.83 | 1.14 | 0.7200 | 0.93 | 0.79 | 1.09 | 0.3662 | 0.96 | 0.81 | 1.12 | 0.5740 | 1.09 | 0.93 | 1.27 | 0.2972 |
| 3 | 0.98 | 0.84 | 1.15 | 0.7990 | 0.97 | 0.83 | 1.14 | 0.7096 | 0.93 | 0.79 | 1.09 | 0.3699 | 0.91 | 0.78 | 1.08 | 0.2850 | 1.07 | 0.91 | 1.26 | 0.4098 |
| 4 | 1.01 | 0.86 | 1.19 | 0.9040 | 0.93 | 0.79 | 1.10 | 0.3870 | 0.86 | 0.73 | 1.02 | 0.0793 | 0.92 | 0.78 | 1.09 | 0.3216 | 1.09 | 0.93 | 1.28 | 0.2864 |
